# Supplementary material for: Photoluminescence and white-light emission in two series of heteronuclear Pb(ii)–Ln(iii) complexes
Source: Royal Society of Chemistry journal article supplement (doi:10.1039/c5nj00168d), 2015-01-01
Supplement: c5nj00168d1.pdf [file c5nj00168d1.pdf]

## Supporting Information

For NJ-ART-01-2015-000168

### Photoluminescence and white-light emitting in two series of heteronuclear Pb(II)-Ln(III) complexes

Cheng Yan<sup>a</sup>, Ling Chen<sup>a</sup>, Mei Pan<sup>a,b\*</sup>, Lu-Yin Zhang<sup>a</sup>, Shao-Yun Yin<sup>a</sup>, Yi-Xuan Zhu<sup>a</sup>, Kai Wu<sup>a</sup>, Ya-Jun Hou<sup>a</sup> and Cheng-Yong Su<sup>a\*</sup>

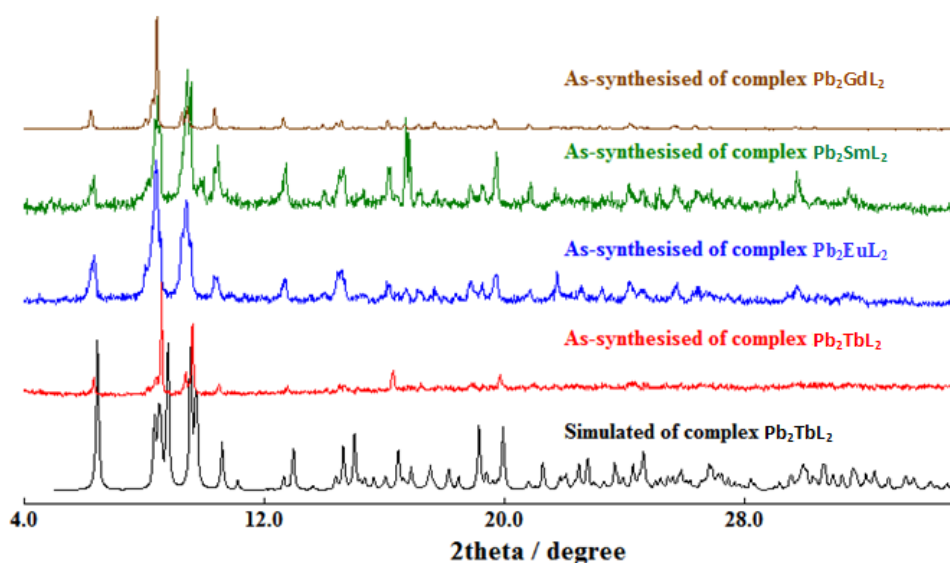

Fig. S1 XRD patterns of  $Pb_2LnL_2$  complexes

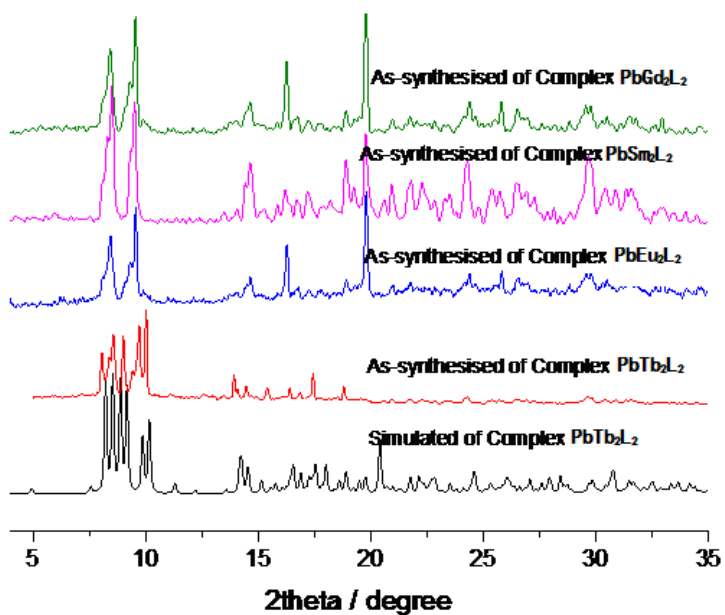

Fig. S2 XRD patterns of  $PbLn_2L_2$  complexes

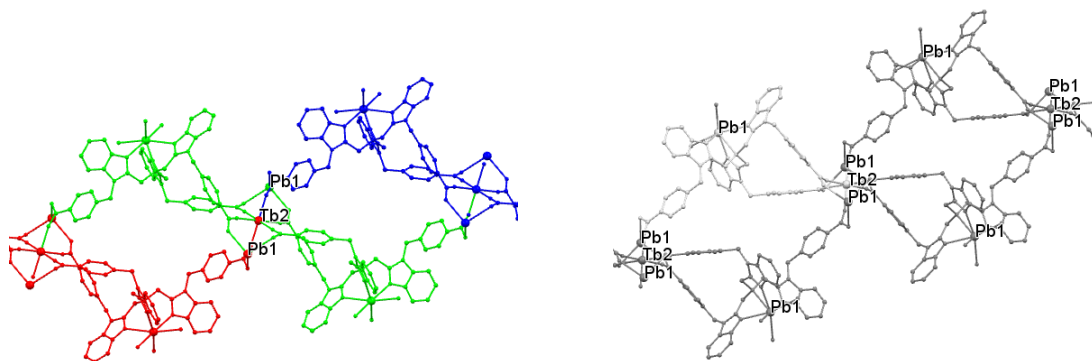

Fig. S3 Loop-and-chain structure in complex  $\text{Pb}_2\text{TbL}_2$  view along different directions.

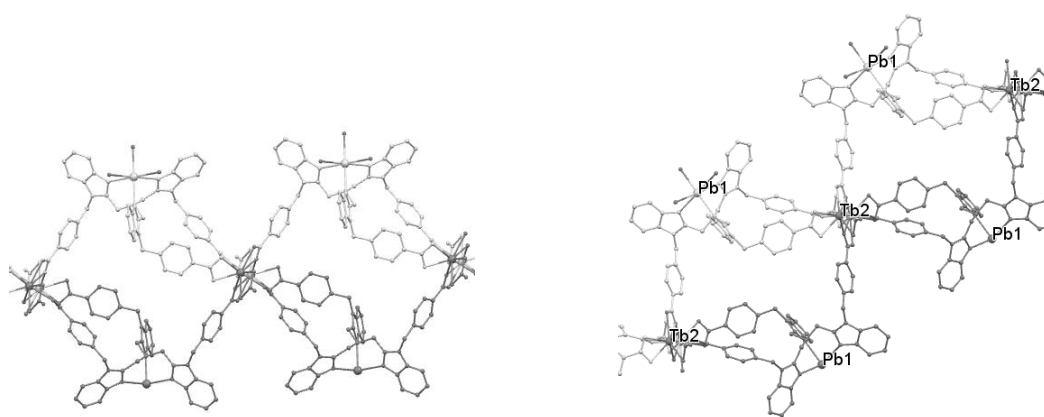

Fig. S4 Loop-and-chain structure in complex  $\text{PbTb}_2\text{L}_2$  view along different directions.

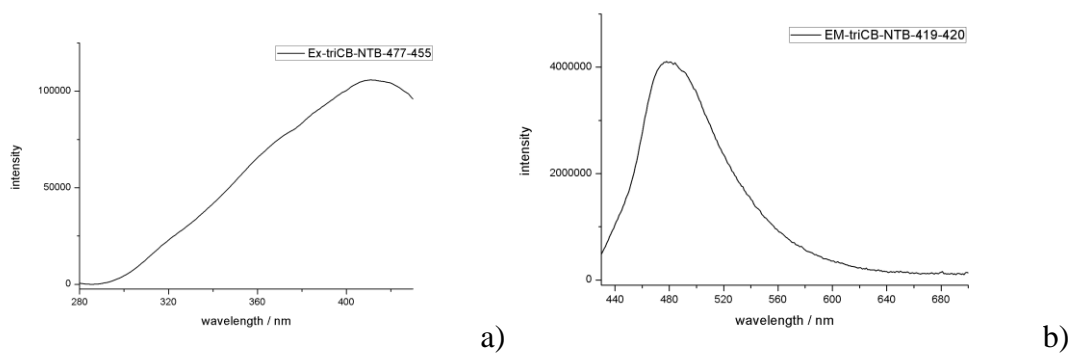

Fig. S5 Excitation (a) and emission (b) spectra of the ligand triCB-NTB ( $\text{H}_3\text{L}$ ).

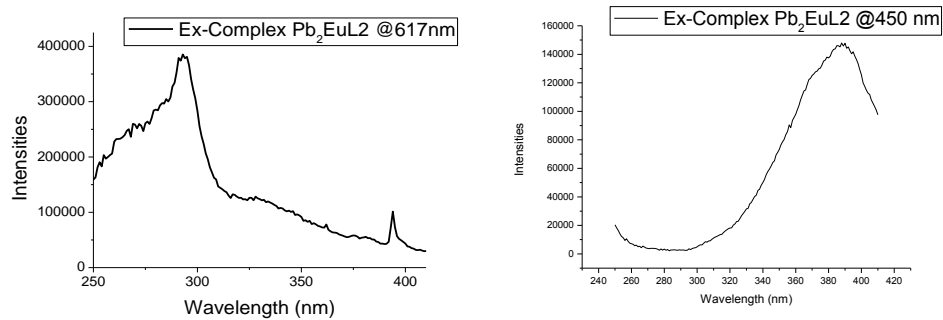

Fig. S6 Excitation spectra of complex  $\text{Pb}_2\text{EuL}_2$ .

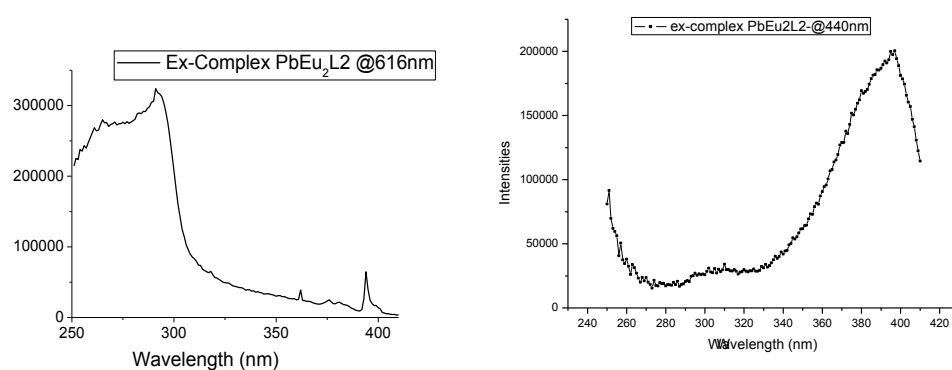

Fig. S7 Excitation spectra of complex  $\text{PbEu}_2\text{L}_2$ .

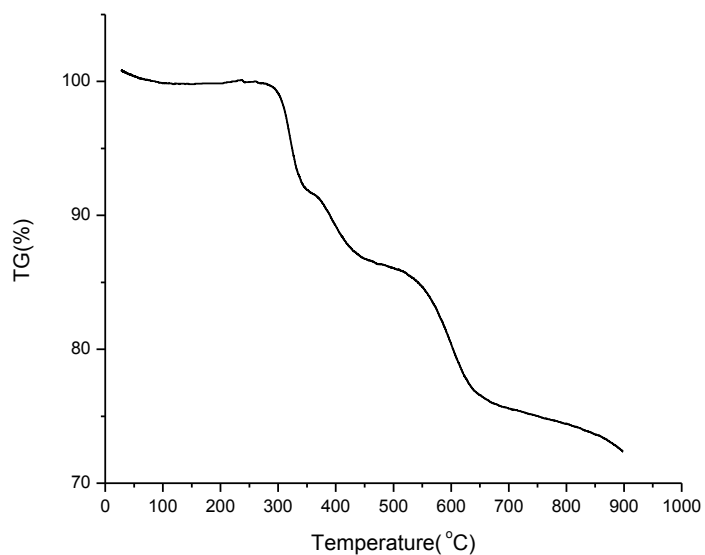

Fig. S8 TG curve of complex  $\text{Pb}_2\text{EuL}_2$ .

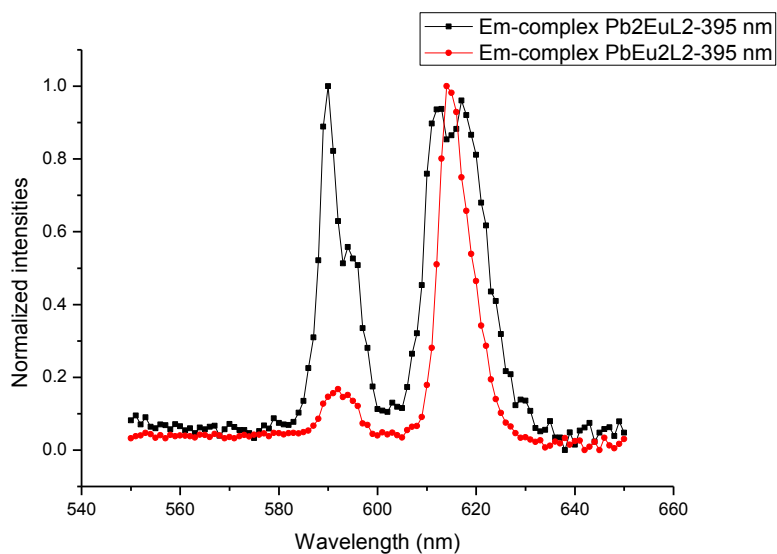

Fig. S9 Comparison between the emission spectra of complexes **Pb<sub>2</sub>EuL<sub>2</sub>** and **PbEu<sub>2</sub>L<sub>2</sub>** at the excitation of 395 nm.

Table S1 Selected bond lengths and angles for the complexes.

Complex **Pb<sub>2</sub>TbL<sub>2</sub>**

| Atom | Atom             | Length/Å | Atom | Atom             | Length/Å |
|------|------------------|----------|------|------------------|----------|
| N15  | Pb1 <sup>1</sup> | 2.812(4) | Pb1  | N20 <sup>6</sup> | 2.501(4) |
| N16  | Pb1 <sup>1</sup> | 2.800(5) | Pb1  | O6 <sup>2</sup>  | 2.628(4) |
| O1   | Tb2              | 2.247(4) | O5   | Tb2              | 2.227(5) |
| O2   | Pb1              | 2.503(4) | Tb2  | O4 <sup>4</sup>  | 2.255(5) |
| O3   | Pb1 <sup>2</sup> | 2.627(4) |      |                  |          |

| Atom            | Atom | Atom            | Angle/°    | Atom             | Atom | Atom             | Angle/°    |
|-----------------|------|-----------------|------------|------------------|------|------------------|------------|
| O1              | Tb2  | O1 <sup>2</sup> | 180.00(17) | O4 <sup>5</sup>  | Tb2  | O5               | 89.2(2)    |
| O1 <sup>2</sup> | Tb2  | O5              | 88.77(16)  | O4 <sup>4</sup>  | Tb2  | O5 <sup>2</sup>  | 89.2(2)    |
| O1 <sup>2</sup> | Tb2  | O5 <sup>2</sup> | 91.23(16)  | O4 <sup>5</sup>  | Tb2  | O5 <sup>2</sup>  | 90.8(2)    |
| O1              | Tb2  | O5 <sup>2</sup> | 88.77(16)  | O4 <sup>4</sup>  | Tb2  | O3 <sup>5</sup>  | 180.0(2)   |
| O1              | Tb2  | O5              | 91.23(16)  | N15 <sup>6</sup> | Pb1  | N16 <sup>6</sup> | 91.03(16)  |
| O5              | Tb2  | O5 <sup>2</sup> | 180.0      | N15 <sup>6</sup> | Pb1  | O13              | 73.71(16)  |
| O4 <sup>4</sup> | Tb2  | O1              | 87.69(19)  | N15 <sup>6</sup> | Pb1  | O3 <sup>2</sup>  | 76.59(15)  |
| O4 <sup>5</sup> | Tb2  | O1 <sup>2</sup> | 87.69(19)  | N16 <sup>6</sup> | Pb1  | O3 <sup>2</sup>  | 167.00(15) |
| O4 <sup>5</sup> | Tb2  | O1              | 92.31(19)  | O2               | Pb1  | N16 <sup>6</sup> | 81.27(15)  |
| O4 <sup>4</sup> | Tb2  | O1 <sup>2</sup> | 92.31(19)  | O2               | Pb1  | O3 <sup>2</sup>  | 98.72(15)  |
| O4 <sup>4</sup> | Tb2  | O5              | 90.8(2)    |                  |      |                  |            |

<sup>1</sup>1/2-X,1/2+Y,1/2-Z; <sup>2</sup>-X,1-Y,1-Z; <sup>3</sup>+X,+Y,-1+Z; <sup>4</sup>-X,1-Y,-Z; <sup>5</sup>+X,+Y,1+Z;

${}^6_{1/2-X,-1/2+Y,1/2-Z}$

Complex **Pb<sub>2</sub>EuL<sub>2</sub>**

| Atom | Atom             | Length/Å | Atom | Atom            | Length/Å |
|------|------------------|----------|------|-----------------|----------|
| N5   | Pb1 <sup>1</sup> | 2.493(4) | Eu2  | O3 <sup>4</sup> | 2.239(5) |
| N8   | Pb1 <sup>1</sup> | 2.601(5) | Eu2  | O3 <sup>5</sup> | 2.239(5) |
| O1   | Eu2              | 2.283(4) | Pb1  | N5 <sup>6</sup> | 2.493(4) |
| O2   | Pb1              | 2.506(4) | Pb1  | N8 <sup>6</sup> | 2.601(5) |
| O6   | Pb1 <sup>2</sup> | 2.628(4) | Pb1  | O6 <sup>2</sup> | 2.628(4) |
| O5   | Eu2              | 2.284(5) | Eu2  | O1 <sup>2</sup> | 2.283(4) |
| O3   | Eu2 <sup>3</sup> | 2.239(5) | Eu2  | O5 <sup>2</sup> | 2.284(5) |

| Atom            | Atom | Atom            | Angle/°    | Atom            | Atom | Atom            | Angle/°    |
|-----------------|------|-----------------|------------|-----------------|------|-----------------|------------|
| O1              | Eu2  | O1 <sup>2</sup> | 180.00(17) | O3 <sup>5</sup> | Eu2  | O5              | 89.2(2)    |
| O1 <sup>2</sup> | Eu2  | O5              | 88.77(16)  | O3 <sup>4</sup> | Eu2  | O5 <sup>2</sup> | 89.2(2)    |
| O1 <sup>2</sup> | Eu2  | O5 <sup>2</sup> | 91.23(16)  | O3 <sup>5</sup> | Eu2  | O5 <sup>2</sup> | 90.8(2)    |
| O1              | Eu2  | O5 <sup>2</sup> | 88.77(16)  | O3 <sup>4</sup> | Eu2  | O3 <sup>5</sup> | 180.0(2)   |
| O1              | Eu2  | O5              | 91.23(16)  | N5 <sup>6</sup> | Pb1  | N8 <sup>6</sup> | 91.03(16)  |
| O5              | Eu2  | O5 <sup>2</sup> | 180.0      | N5 <sup>6</sup> | Pb1  | O2              | 73.71(16)  |
| O3 <sup>4</sup> | Eu2  | O1              | 87.69(19)  | N5 <sup>6</sup> | Pb1  | O6 <sup>2</sup> | 76.59(15)  |
| O3 <sup>5</sup> | Eu2  | O1 <sup>2</sup> | 87.69(19)  | N8 <sup>6</sup> | Pb1  | O6 <sup>2</sup> | 167.00(15) |
| O3 <sup>5</sup> | Eu2  | O1              | 92.31(19)  | O2              | Pb1  | N8 <sup>6</sup> | 81.27(15)  |
| O3 <sup>4</sup> | Eu2  | O1 <sup>2</sup> | 92.31(19)  | O2              | Pb1  | O6 <sup>2</sup> | 98.72(15)  |
| O3 <sup>4</sup> | Eu2  | O5              | 90.8(2)    |                 |      |                 |            |

${}^1_{1/2-X,1/2+Y,1/2-Z}$ ;  ${}^2_{-X,1-Y,1-Z}$ ;  ${}^3_{+X,+Y,-1+Z}$ ;  ${}^4_{-X,1-Y,-Z}$ ;  ${}^5_{+X,+Y,1+Z}$ ;

${}^6_{1/2-X,-1/2+Y,1/2-Z}$

Complex **PbTb<sub>2</sub>L<sub>2</sub>**

| Atom | Atom             | Length/Å | Atom | Atom             | Length/Å |
|------|------------------|----------|------|------------------|----------|
| N5   | Pb1              | 2.662(5) | O8   | Tb2              | 2.348(5) |
| N8   | Pb1              | 2.712(5) | O3   | Tb2 <sup>2</sup> | 2.365(4) |
| N11  | Pb1              | 2.804(5) | Tb2  | O6 <sup>1</sup>  | 2.367(4) |
| Pb1  | N5 <sup>5</sup>  | 2.662(5) | Tb2  | O2 <sup>1</sup>  | 2.382(4) |
| Pb1  | N8 <sup>5</sup>  | 2.710(5) | Tb2  | O7 <sup>4</sup>  | 2.413(4) |
| Pb1  | N11 <sup>5</sup> | 2.678(5) | Tb2  | O9 <sup>2</sup>  | 2.548(4) |
|      |                  |          | Tb2  | O4 <sup>2</sup>  | 2.513(5) |
| O1   | Tb2              | 2.416(4) | Tb2  | O3 <sup>2</sup>  | 2.603(4) |

| Atom            | Atom | Atom            | Angle/°   | Atom            | Atom | Atom            | Angle/°    |
|-----------------|------|-----------------|-----------|-----------------|------|-----------------|------------|
| O6 <sup>1</sup> | Tb2  | N10             | 104.7(4)  | O4 <sup>2</sup> | Tb2  | O6 <sup>1</sup> | 131.80(15) |
| O6 <sup>1</sup> | Tb2  | O5 <sup>1</sup> | 51.64(14) | O4 <sup>2</sup> | Tb2  | O5 <sup>1</sup> | 140.80(17) |

|                 |     |                 |            |                  |     |                  |            |
|-----------------|-----|-----------------|------------|------------------|-----|------------------|------------|
| O6 <sup>1</sup> | Tb2 | O8              | 137.2(2)   | O4 <sup>2</sup>  | Tb2 | O8               | 69.2(2)    |
| O6 <sup>1</sup> | Tb2 | O3 <sup>2</sup> | 81.81(15)  | O4 <sup>2</sup>  | Tb2 | O3 <sup>2</sup>  | 52.47(16)  |
| O7              | Tb2 | N10             | 29.5(4)    | O1               | Tb2 | N10              | 70.2(4)    |
| O7              | Tb2 | O6 <sup>1</sup> | 75.57(18)  | O1               | Tb2 | O6 <sup>1</sup>  | 93.16(16)  |
| O7              | Tb2 | O5 <sup>1</sup> | 114.35(17) | O1               | Tb2 | O7               | 76.32(18)  |
| O7              | Tb2 | O8              | 62.5(2)    | O1               | Tb2 | O5 <sup>4</sup>  | 75.51(16)  |
| O7              | Tb2 | O4 <sup>2</sup> | 102.1(2)   | O1               | Tb2 | O5 <sup>1</sup>  | 71.47(15)  |
| O7              | Tb2 | O3 <sup>2</sup> | 74.64(17)  | O1               | Tb2 | O8               | 69.69(19)  |
| O5 <sup>1</sup> | Tb2 | N10             | 132.9(4)   | O1               | Tb2 | O2 <sup>2</sup>  | 136.69(16) |
| O5 <sup>4</sup> | Tb2 | N10             | 119.6(4)   | O1               | Tb2 | O4 <sup>2</sup>  | 133.85(16) |
| O5 <sup>4</sup> | Tb2 | O6 <sup>1</sup> | 125.59(15) | O1               | Tb2 | O3 <sup>2</sup>  | 150.87(16) |
| O5 <sup>4</sup> | Tb2 | O7              | 145.39(17) | O3 <sup>2</sup>  | Tb2 | N10              | 83.3(4)    |
| O5 <sup>4</sup> | Tb2 | O5 <sup>1</sup> | 74.66(15)  | O3 <sup>2</sup>  | Tb2 | O5 <sup>1</sup>  | 123.48(14) |
| O5 <sup>4</sup> | Tb2 | O8              | 88.9(2)    | N5 <sup>5</sup>  | Pb1 | N5               | 180.0      |
| O5 <sup>4</sup> | Tb2 | O2 <sup>2</sup> | 75.38(15)  | N5               | Pb1 | N8 <sup>5</sup>  | 79.24(15)  |
| O5 <sup>4</sup> | Tb2 | O4 <sup>2</sup> | 83.56(17)  | N5 <sup>5</sup>  | Pb1 | N8 <sup>5</sup>  | 100.76(16) |
| O5 <sup>4</sup> | Tb2 | O3 <sup>2</sup> | 130.27(15) | N5 <sup>5</sup>  | Pb1 | N8               | 79.24(15)  |
| O8              | Tb2 | N10             | 33.0(4)    | N5               | Pb1 | N8               | 100.76(16) |
| O8              | Tb2 | O5 <sup>1</sup> | 140.51(17) | N5 <sup>5</sup>  | Pb1 | N11              | 84.02(15)  |
| O8              | Tb2 | O3 <sup>2</sup> | 94.66(19)  | N5               | Pb1 | N11              | 95.98(15)  |
| O2 <sup>2</sup> | Tb2 | N10             | 153.1(4)   | N5 <sup>5</sup>  | Pb1 | N11 <sup>5</sup> | 95.98(15)  |
| O2 <sup>2</sup> | Tb2 | O6 <sup>1</sup> | 78.71(16)  | N5               | Pb1 | N11 <sup>5</sup> | 84.02(15)  |
| O2 <sup>2</sup> | Tb2 | O7              | 139.11(18) | N8 <sup>5</sup>  | Pb1 | N8               | 180.0      |
| O2 <sup>2</sup> | Tb2 | O5 <sup>1</sup> | 70.35(14)  | N11 <sup>5</sup> | Pb1 | N8               | 80.50(15)  |
| O2 <sup>2</sup> | Tb2 | O8              | 140.3(2)   | N11 <sup>5</sup> | Pb1 | N8 <sup>5</sup>  | 99.50(15)  |
| O2 <sup>2</sup> | Tb2 | O4 <sup>2</sup> | 72.84(17)  | N11              | Pb1 | N8 <sup>5</sup>  | 80.50(15)  |
| O2 <sup>2</sup> | Tb2 | O3 <sup>2</sup> | 70.64(15)  | N11              | Pb1 | N8               | 99.50(15)  |
| O4 <sup>2</sup> | Tb2 | N10             | 86.2(4)    | N11              | Pb1 | N11 <sup>5</sup> | 180.0      |

<sup>1</sup>-X,2-Y,4-Z; <sup>2</sup>-1-X,3-Y,4-Z; <sup>3</sup>1+X,-1+Y,+Z; <sup>4</sup>-1+X,1+Y,+Z; <sup>5</sup>-X,2-Y,3-Z
